# Supplementary material
Source: PubMed Central journal article supplement (PMC4654976)
Supplement: NIHMS730581-supplement-2.pdf [file NIHMS730581-supplement-2.pdf]

Figure S1

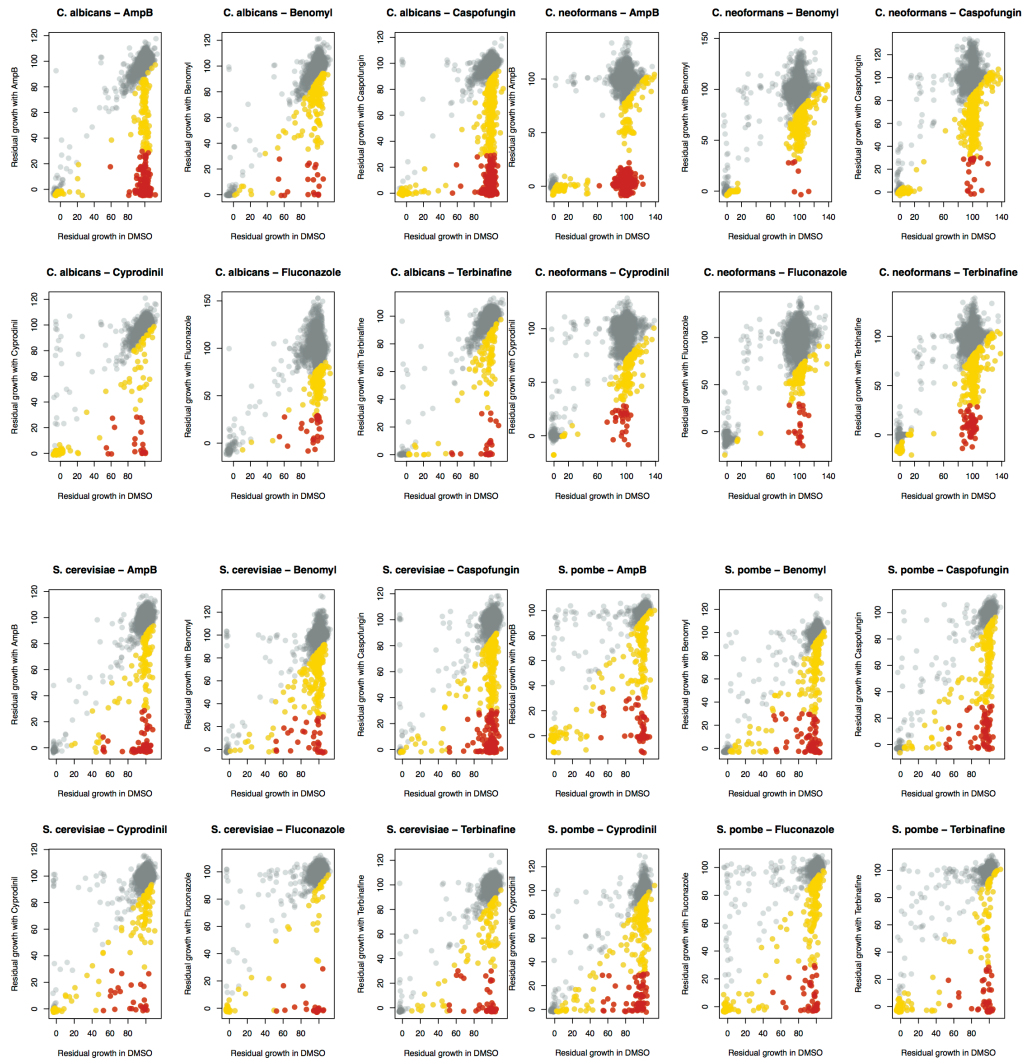

Figure S2

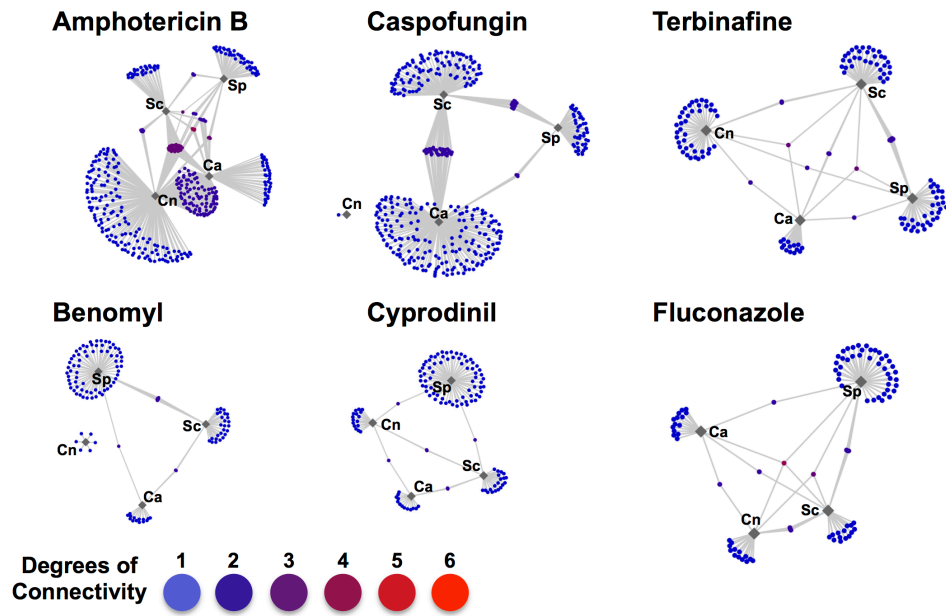

Figure S3

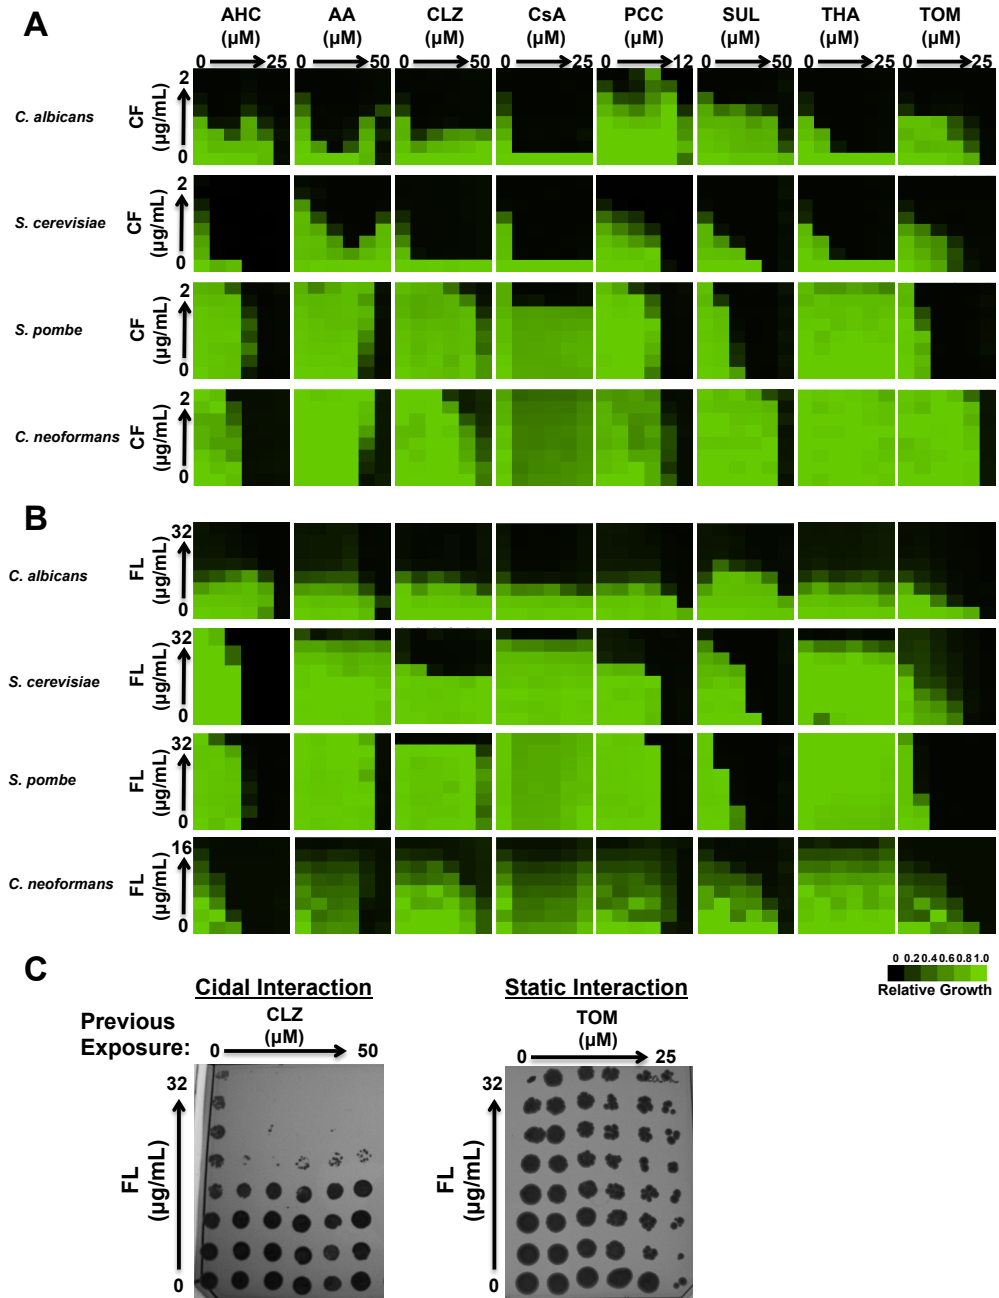

Figure S4

**A**

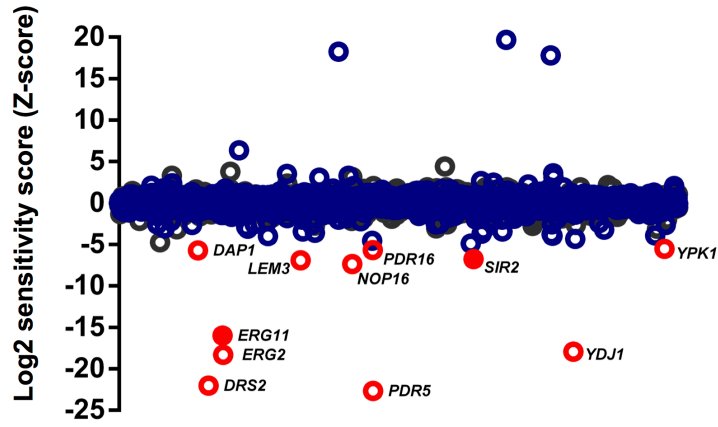

**B**

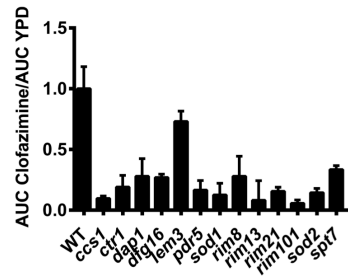

Figure S5

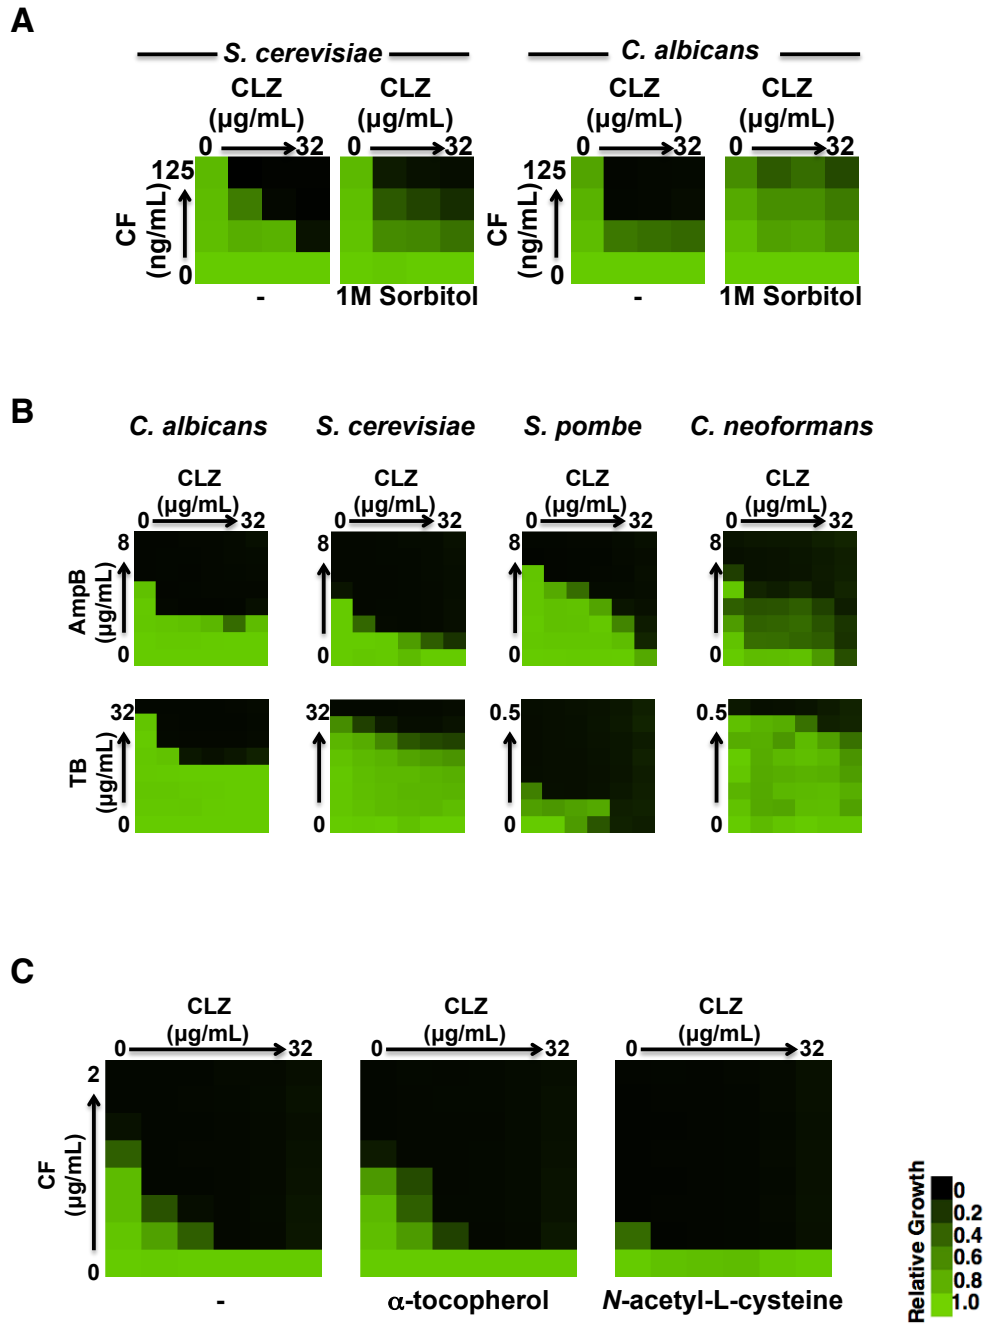

Figure S6

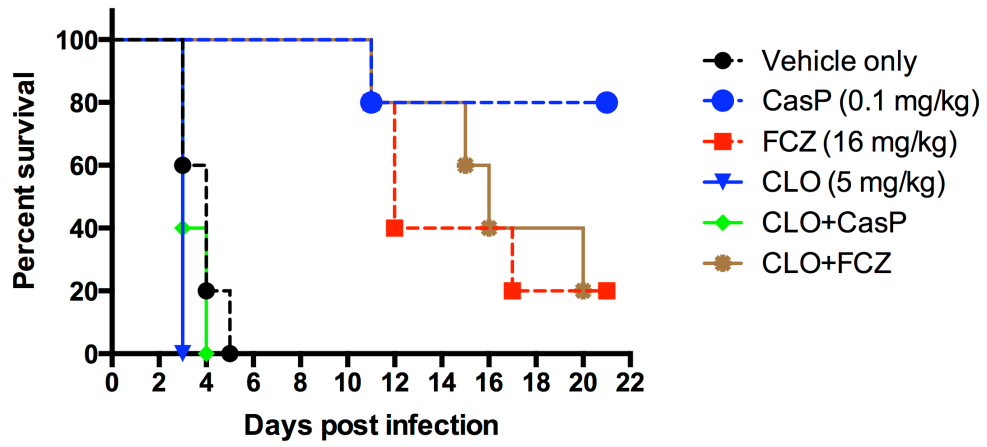

## SUPPLEMENTAL FIGURE LEGENDS

**Figure S1. Primary screening data for bioactive compounds that potentiate antifungals in four fungal species.** The scatterplots shows the normalized residual growth of *C. albicans* (top left), *C. neoformans* (top right), *S. cerevisiae* (bottom left), and *S. pombe* (bottom right) for each compound in the absence (x axis) and presence of antifungal (y axis). Those compounds that are 3 MADs below the diagonal were colored yellow. Compounds that were 3 MADs below the diagonal, inhibited growth less than 50% without antifungal, and inhibited growth greater than 80% with antifungal are colored red. Red compounds were classified as hits and were used for comparative analysis. Related to Figure 1 and Figure 2.

**Figure S2. Chemical-species interaction networks.** Chemical-species networks are generated for each individual antifungal. Compounds that potentiated an antifungal are depicted as circles and are connected by edges to the species in which synergy was observed. Each circle is color-coded to reflect its degree of connectivity (frequency of occurrence in the screens). Species in which the screen was conducted are shown as gray diamonds. (*C. albicans* (Ca), *C. neoformans* (Cn), *S. cerevisiae* (Sc) or *S. pombe* (Sp)). Related to Figure 1 and Figure 2.

**Figure S3. ACM hit validation and characterization. A-B)** Checkerboard assays confirm drug interactions between those compounds identified as hits during screening and caspofungin (CF) (A) or fluconazole (FL) (B). Two-fold serial dilutions of CF or FL were combined with two-fold dilutions of the following compounds: Amiodarone Hydrochloride (AHC), Asiatic Acid (AA), Clofazimine (CLZ), Cyclosporin A (CsA), Palmitoyl-DL-Carnitine Chloride (PCC), Suloctidil (SUL), Thapsigargin (THA), and

Tomatidine (TOM). Growth was measured by OD<sub>600</sub> and data was quantitatively displayed with color using Treeview (see color bar). **C)** Examples of cidal and static drug interactions. Checkerboard assays with two-fold dilutions of FL in combination with CLZ or TOM in *C. albicans* were performed in SC and incubated for 48 hours at 30°C. Cells from the checkerboard assays were spotted onto YPD medium and incubated at 30°C for 48 hours before plates were photographed. Related to Figure 3 and Table S5.

**Figure S4. Genome-wide chemical-genetic interactions for fluconazole and validation of clofazimine sensitive mutants.** **A)** Sensitivity of heterozygous essential deletion strains (gray circles) and homozygous deletion strains (blue circles) to clofazimine as assessed by haploinsufficiency (HIP) and homozygous deletion profiling (HOP). Those deletion strains that have a Z-score more significant than three standard-deviations below the mean are highlighted in red, filled circles represent heterozygous strains and open circles represent homozygous strains. *ERG11*, the known target of fluconazole, was the most sensitive heterozygous deletion strain. The fluconazole exporter *PDR5*, as well as other genes known to be sensitive to fluconazole were identified by HOP analysis. **B)** Deletion strains identified in the HIP-HOP analysis were confirmed to be sensitive to CLZ by growth curve analysis. Individual mutants were grown in the absence and presence of CLZ over 48 hours and the area under the curve (AUC) was calculated. Data are means  $\pm$  standard deviation of triplicates. Related to Figure 5.

**Figure S5. Clofazimine is potentiates antifungals in yeast due to perturbation of membranes, not through the generation of oxidative stress.** **A)** Two-fold serial dilutions of caspofungin (CF) were combined with two-fold dilutions of clofazimine



(CLZ) in the absence or presence of 1M sorbitol in SC media. Growth was measured by OD<sub>600</sub> and data was quantitatively displayed with color using Treeview (see color bar). **B)** Two-fold serial dilutions of amphotericin B (AmpB) or terbinafine (TB) were combined with two-fold dilutions of clofazimine (CLZ). Growth was analyzed as in part A. **C)** Two-fold serial dilutions of caspofungin (CF) were combined with two-fold dilutions of CLZ in the absence and presence of antioxidants  $\alpha$ -tocopherol (12.5 $\mu$ g/mL) or *N*-acetyl-L-cysteine (5mM). Data was analyzed as described in part A. Related to Figure 6.

**Figure S6. Clofazimine does not potentiate antifungals in a mammalian model of fungal infection.** CD1 mice were infected with an inoculum of 200  $\mu$ L of  $1 \times 10^6$  CFU/mL of SC5314. Fluconazole (16 mg/kg) and caspofungin (0.1 mg/kg) were administered i.p. and clofazimine (5 mg/kg) was administered by oral gavage. Drugs were given 4 h, 24 h, 48 h, and 72 h post-infection. Viability was scored daily. Related to Figure 7.

**Table S1.  $\frac{1}{4}$  Minimum Inhibitory Concentration (MIC) of antifungals against different fungal species used for the generation of the ACM. Related to Figure 1.**

| Compound       | <i>C. albicans</i><br>MIC ( $\mu\text{g/mL}$ ) | <i>C. neoformans</i><br>MIC ( $\mu\text{g/mL}$ ) | <i>S. cerevisiae</i><br>MIC ( $\mu\text{g/mL}$ ) | <i>S. pombe</i> MIC<br>( $\mu\text{g/mL}$ ) |
|----------------|------------------------------------------------|--------------------------------------------------|--------------------------------------------------|---------------------------------------------|
| Amphotericin B | 0.25                                           | 1                                                | 0.25                                             | 0.25                                        |
| Benomyl        | 8                                              | 2                                                | 2                                                | 1                                           |
| Caspofungin    | 0.13                                           | 2*                                               | 0.13                                             | 0.5                                         |
| Cyprodinil     | 16                                             | 16                                               | 8                                                | 2                                           |
| Fluconazole    | 0.5                                            | 8                                                | 8                                                | 64                                          |
| Terbinafine    | 4                                              | 1                                                | 16                                               | 0.02                                        |

\* Since we were unable to calculate a MIC for caspofungin against *C. neoformans* we used a concentration of 2  $\mu\text{g/mL}$  for the primary screen.

**Table S2. Normalized Primary Screening Data.** Related to Figure 1 and Figure 2.

**Table S3. Compounds Identified as Antifungal Potentiators in the Antifungal Combination Matrix.** Related to Figure 1 and Figure 2.

**Table S4. Compounds Identified in the ACM that Potentiated Indicated Antifungal.**  
Related to Figure 3.

| <u>Compound</u>                 | <u>Therapeutic Use</u>                                                                                                     | <u>Screen Identified (Species: Antifungal)</u>                                                                                                    |
|---------------------------------|----------------------------------------------------------------------------------------------------------------------------|---------------------------------------------------------------------------------------------------------------------------------------------------|
| Amiodarone Hydrochloride        | <ul style="list-style-type: none"> <li>• Na<sup>+</sup>/K<sup>+</sup> channel blocker</li> <li>• Antiarrhythmic</li> </ul> | <i>C. albicans</i> : AmpB, CF<br><i>C. neoformans</i> : AmpB, FL<br><i>S. cerevisiae</i> : AmpB, CF, FL                                           |
| Asiatic Acid                    | <ul style="list-style-type: none"> <li>• Anticancer</li> </ul>                                                             | <i>C. albicans</i> : AmpB, CF, FL<br><i>C. neoformans</i> : AmpB<br><i>S. cerevisiae</i> : AmpB, CF<br><i>S. pombe</i> : AmpB                     |
| Clofazimine                     | <ul style="list-style-type: none"> <li>• Antileprosy agent</li> <li>• Antimycobacterial agent</li> </ul>                   | <i>C. albicans</i> : AmpB, CF, TB<br><i>C. neoformans</i> : AmpB                                                                                  |
| Cyclosporin A                   | <ul style="list-style-type: none"> <li>• Immunosuppressant</li> <li>• Calcineurin inhibitor</li> </ul>                     | <i>C. albicans</i> : AmpB, CF, TB<br><i>C. neoformans</i> : AmpB, Cyp, FL, TB<br><i>S. cerevisiae</i> : AmpB, CF, TB                              |
| Palmitoyl-DL-Carnitine Chloride | <ul style="list-style-type: none"> <li>• Protein Kinase C inhibitor</li> </ul>                                             | <i>S. cerevisiae</i> : AmpB, Ben, CF, Cyp, FL, TB                                                                                                 |
| Suloctidil                      | <ul style="list-style-type: none"> <li>• Vasodilator</li> <li>• Hypocholesterolemic drug</li> </ul>                        | <i>C. albicans</i> : CF<br><i>C. neoformans</i> : AmpB, Cyp, FL<br><i>S. cerevisiae</i> : CF, FL, TB<br><i>S. pombe</i> : FL, TB                  |
| Thapsigargin                    | <ul style="list-style-type: none"> <li>• Sarco-endoplasmic reticulum Ca(2+)-ATPases inhibitor</li> </ul>                   | <i>C. albicans</i> : AmpB, CF<br><i>C. neoformans</i> : AmpB<br><i>S. cerevisiae</i> : AmpB, Ben, CF, FL, TB                                      |
| Tomatidine                      | <ul style="list-style-type: none"> <li>• Antifungal</li> </ul>                                                             | <i>C. albicans</i> : Ben, CF, Cyp, FL, TB<br><i>C. neoformans</i> : FL<br><i>S. cerevisiae</i> : Ben, CF, Cyp, FL, TB<br><i>S. pombe</i> : FL, TB |

**Table S5. ACM compound chemical interactions with antifungals. Calculated Fractional Inhibitory Concentration Index. Related to Figure 3.**

| Strain               | ACM Compound  | MIC ACM Compound (μM) | FIC <sup>1</sup> ACM Compound | MIC caspofungin (μg/mL) | FIC <sup>1</sup> caspofungin | FIC Index <sup>2</sup> |
|----------------------|---------------|-----------------------|-------------------------------|-------------------------|------------------------------|------------------------|
| <i>C. albicans</i>   | AHC           | 25                    | 0.13                          | 0.5                     | 0.13                         | 0.3                    |
| <i>C. albicans</i>   | Asiatic Acid  | 50                    | 0.13                          | 0.5                     | 0.06                         | 0.2                    |
| <i>C. albicans</i>   | Clofazimine   | ≥100                  | 0.03                          | 0.5                     | 0.13                         | 0.2                    |
| <i>C. albicans</i>   | Cyclosporin A | ≥50                   | 0.06                          | 0.5                     | 0.06                         | 0.1                    |
| <i>C. albicans</i>   | PCC           | 25                    | 0.5                           | 0.5                     | 0.5                          | 1                      |
| <i>C. albicans</i>   | Suloctidil    | ≥100                  | 0.5                           | 0.5                     | 0.06                         | 0.6                    |
| <i>C. albicans</i>   | Thapsigargin  | ≥50                   | 0.5                           | 0.5                     | 0.06                         | 0.6                    |
| <i>C. albicans</i>   | Tomatidine    | 25                    | 0.5                           | 0.5                     | 0.06                         | 0.6                    |
| <i>S. cerevisiae</i> | AHC           | 6.25                  | 0.25                          | 0.5                     | 0.06                         | 0.3                    |
| <i>S. cerevisiae</i> | Asiatic Acid  | ≥50                   | 0.25                          | 0.5                     | 0.13                         | 0.4                    |
| <i>S. cerevisiae</i> | Clofazimine   | ≥100                  | 0.03                          | 0.5                     | 0.06                         | 0.1                    |
| <i>S. cerevisiae</i> | Cyclosporin A | ≥50                   | 0.06                          | 0.5                     | 0.06                         | 0.1                    |
| <i>S. cerevisiae</i> | PCC           | 6.25                  | 0.5                           | 0.5                     | 0.25                         | 0.8                    |
| <i>S. cerevisiae</i> | Suloctidil    | 25                    | 0.5                           | 0.5                     | 0.06                         | 0.6                    |
| <i>S. cerevisiae</i> | Thapsigargin  | ≥50                   | 0.5                           | 0.5                     | 0.06                         | 0.6                    |
| <i>S. cerevisiae</i> | Tomatidine    | 12.5                  | 0.25                          | 0.5                     | 0.25                         | 0.5                    |
| <i>S. pombe</i>      | AHC           | 6.25                  | 0.5                           | 4                       | 0.5                          | 1                      |
| <i>S. pombe</i>      | Asiatic Acid  | 50                    | 1                             | 4                       | 0.5                          | 1.5                    |
| <i>S. pombe</i>      | Clofazimine   | ≥100                  | 0.5                           | 4                       | 0.13                         | 0.6                    |
| <i>S. pombe</i>      | Cyclosporin A | ≥50                   | 0.06                          | 4                       | 0.25                         | 0.3                    |
| <i>S. pombe</i>      | PCC           | 6.25                  | 0.5                           | 4                       | 0.25                         | 0.8                    |
| <i>S. pombe</i>      | Suloctidil    | 12.5                  | 0.5                           | 4                       | 0.02                         | 0.5                    |
| <i>S. pombe</i>      | Thapsigargin  | ≥50                   | 1                             | 4                       | 1                            | 2                      |
| <i>S. pombe</i>      | Tomatidine    | 3.125                 | 0.5                           | 4                       | 0.13                         | 0.6                    |
| <i>C. neoformans</i> | AHC           | 6.25                  | 0.5                           | ≥4                      | 0.5                          | 1                      |
| <i>C. neoformans</i> | Asiatic Acid  | 25                    | 2                             | ≥4                      | 0.5                          | 2.5                    |
| <i>C. neoformans</i> | Clofazimine   | ≥100                  | 0.25                          | ≥4                      | 0.13                         | 0.4                    |
| <i>C. neoformans</i> | Cyclosporin A | ≥50                   | 1                             | ≥4                      | 1                            | 2                      |
| <i>C. neoformans</i> | PCC           | 12                    | 1                             | ≥4                      | 1                            | 2                      |
| <i>C. neoformans</i> | Suloctidil    | 50                    | 0.5                           | ≥4                      | 0.5                          | 1                      |
| <i>C. neoformans</i> | Thapsigargin  | ≥50                   | 1                             | ≥4                      | 1                            | 2                      |
| <i>C. neoformans</i> | Tomatidine    | 25                    | 1                             | ≥4                      | 1                            | 2                      |
| Strain               | ACM Compound  | MIC ACM Compound (μM) | FIC <sup>1</sup> ACM Compound | MIC fluconazole (μg/mL) | FIC <sup>1</sup> fluconazole | FIC Index <sup>2</sup> |
| <i>C. albicans</i>   | AHC           | 25                    | 0.5                           | 2                       | 1                            | 1.5                    |
| <i>C. albicans</i>   | Asiatic Acid  | 50                    | 0.5                           | 2                       | 1                            | 1.5                    |
| <i>C. albicans</i>   | Clofazimine   | ≥100                  | 1                             | 2                       | 1                            | 2                      |
| <i>C. albicans</i>   | Cyclosporin A | ≥50                   | 0.5                           | 2                       | 0.5                          | 1                      |
| <i>C. albicans</i>   | PCC           | 25                    | 0.5                           | 2                       | 0.25                         | 0.8                    |
| <i>C. albicans</i>   | Suloctidil    | ≥100                  | 0.5                           | 2                       | 0.5                          | 1                      |
| <i>C. albicans</i>   | Thapsigargin  | ≥50                   | 1                             | 2                       | 1                            | 2                      |
| <i>C. albicans</i>   | Tomatidine    | 25                    | 0.13                          | 2                       | 0.25                         | 0.4                    |
| <i>S. cerevisiae</i> | AHC           | 6.25                  | 0.5                           | 32                      | 0.5                          | 1                      |

|                      |               |       |      |    |      |     |
|----------------------|---------------|-------|------|----|------|-----|
| <i>S. cerevisiae</i> | Asiatic Acid  | ≥50   | 1    | 32 | 1    | 2   |
| <i>S. cerevisiae</i> | Clofazimine   | ≥100  | 0.06 | 32 | 0.25 | 0.3 |
| <i>S. cerevisiae</i> | Cyclosporin A | ≥50   | 1    | 32 | 1    | 2   |
| <i>S. cerevisiae</i> | PCC           | 6.25  | 0.5  | 32 | 0.13 | 0.6 |
| <i>S. cerevisiae</i> | Suloctidil    | 25    | 0.5  | 32 | 0.02 | 0.5 |
| <i>S. cerevisiae</i> | Thapsigargin  | ≥50   | 0.5  | 32 | 0.5  | 1   |
| <i>S. cerevisiae</i> | Tomatidine    | 12.5  | 0.25 | 32 | 0.03 | 0.3 |
| <i>S. pombe</i>      | AHC           | 6.25  | 0.5  | 64 | 0.5  | 1   |
| <i>S. pombe</i>      | Asiatic Acid  | 50    | 1    | 64 | 1    | 2   |
| <i>S. pombe</i>      | Clofazimine   | ≥100  | 0.5  | 64 | 0.25 | 0.8 |
| <i>S. pombe</i>      | Cyclosporin A | ≥50   | 1    | 64 | 1    | 2   |
| <i>S. pombe</i>      | PCC           | 6.25  | 0.5  | 64 | 0.5  | 1   |
| <i>S. pombe</i>      | Suloctidil    | 12.5  | 0.5  | 64 | 0.02 | 0.5 |
| <i>S. pombe</i>      | Thapsigargin  | ≥50   | 1    | 64 | 1    | 2   |
| <i>S. pombe</i>      | Tomatidine    | 3.125 | 0.5  | 64 | 0.13 | 0.6 |
| <i>C. neoformans</i> | AHC           | 6.25  | 0.5  | 16 | 0.02 | 0.5 |
| <i>C. neoformans</i> | Asiatic Acid  | 25    | 1    | 16 | 1    | 2   |
| <i>C. neoformans</i> | Clofazimine   | ≥100  | 0.25 | 16 | 0.13 | 0.4 |
| <i>C. neoformans</i> | Cyclosporin A | ≥50   | 1    | 16 | 1    | 2   |
| <i>C. neoformans</i> | PCC           | 12    | 1    | 16 | 1    | 2   |
| <i>C. neoformans</i> | Suloctidil    | 50    | 0.5  | 16 | 0.06 | 0.6 |
| <i>C. neoformans</i> | Thapsigargin  | ≥50   | 1    | 16 | 1    | 2   |
| <i>C. neoformans</i> | Tomatidine    | 25    | 0.25 | 16 | 0.06 | 0.3 |

<sup>1</sup> Fractional Inhibitory Concentration (FIC) = [X]/MIC<sub>x</sub>, where [X] is the lowest inhibitory concentration of drug in the presence of the co-drug.

<sup>2</sup> FIC index = FIC<sub>ACM compound</sub> + FIC<sub>antifungal</sub>

**Table S6. Dataset for Haploinsufficiency Profiling and Homozygous Deletion Profiling. Calculated Z-scores from all diploid and haploid deletion strain sensitivity profile. Related to Figure 5.**

**Table S7. Strains used in this study.** Related to Figure 1.

| Strain Name            | Description                                               | Genotype                                                            | Source                                              |
|------------------------|-----------------------------------------------------------|---------------------------------------------------------------------|-----------------------------------------------------|
| <b>GDW39</b>           | <i>C. albicans</i> NCCLS 11                               | Wild type                                                           | ATCC # 90028                                        |
| <b>GDW361</b>          | <i>S. cerevisiae</i> BY4741                               | <i>MAT a his3Δ leu2Δ met15Δ ura3Δ</i>                               | (Giaever et al., 2002)                              |
| <b>GDW508</b>          | <i>C. albicans</i> Y537                                   | Amphotericin B Resistant Clinical Isolate                           | ATCC # 200955                                       |
| <b>GDW509</b>          | <i>C. tropicalis</i>                                      | Wild type                                                           | ATCC # 200956                                       |
| <b>GDW655</b>          | <i>C. neoformans</i> H99                                  | Wild type                                                           | Strain received from James W. Kronstad              |
| <b>GDW1004</b>         | <i>S. pombe</i>                                           | Wild type                                                           | ATCC # 38366                                        |
| <b>GDW1584</b>         | <i>C. parapsilosis</i>                                    | Wild type                                                           | ATCC # 22019                                        |
| <b>GDW1585</b>         | <i>C. albicans</i> Fluconazole Resistant Clinical Isolate | CAP-F-1-2008 LL#99383                                               | Deborah Yamamura, St Joseph's Hospital, Hamilton ON |
| <b>GDW1586</b>         | <i>C. albicans</i> Fluconazole Resistant Clinical Isolate | CAP-F-07-2007 LL#99359                                              | Deborah Yamamura, St Joseph's Hospital, Hamilton ON |
| <b>GDW1587</b>         | <i>C. glabrata</i>                                        |                                                                     | Deborah Yamamura, St Joseph's Hospital, Hamilton ON |
| <b>GDW2295</b>         | <i>A. fumigatus</i> Af293                                 | Wild type                                                           | (Nierman et al. 2005)                               |
| <b>GDW2590</b>         | <i>C. albicans</i> , SN95                                 | <i>arg4Δ/arg4Δhis1Δ/his1Δ URA3/ura3Δ::imm434 IRO1/iro1Δ::imm434</i> | (Noble, SM and Johnson AD. 2005)                    |
| <b>GDW2592</b>         | <i>C. albicans</i> <i>pkc1/pkc1</i>                       | As SN95, <i>CaTAR::HIS3 pkc1::FRT/pkc1::FRT</i>                     | (Lafayette et. al.2010)                             |
| <b>GDW2593</b>         | <i>C. albicans</i> <i>pkc1Δ/pkc1Δ + PKC1</i>              | As SN95, <i>CaTAR::HIS3 pkc1::FRT/pkc1::FRT::CaPKC1-FRT</i>         | (Lafayette et. al.2010)                             |
| <b>GDW2597</b>         | <i>S. cerevisiae</i> , SLT2-GFP                           | <i>MAT a his3Δ leu2Δ met15Δ ura3Δ</i>                               | (Huh, W-K et al. 2003)                              |
| <b>Sc <i>bck1</i></b>  | <i>S. cerevisiae</i> BY4741 <i>bck1Δ</i>                  | As BY4741, <i>bck1::KAN</i>                                         | Homozygous Deletion Library                         |
| <b>Sc <i>dfg16</i></b> | <i>S. cerevisiae</i> BY4741 <i>dfg16Δ</i>                 | As BY4741, <i>dfg16::KAN</i>                                        | Homozygous Deletion Library                         |

|                            |                                                     |                                     |                                  |
|----------------------------|-----------------------------------------------------|-------------------------------------|----------------------------------|
| <b>Sc <i>mkk2</i></b>      | <i>S. cerevisiae</i><br>BY4741 <i>mkk2Δ</i>         | As BY4741, <i>mkk2::KAN</i>         | Homozygous<br>Deletion Library   |
| <b>Sc <i>PKC1/pkc1</i></b> | <i>S. cerevisiae</i><br>BY4743<br><i>PKC1/pkc1Δ</i> | As BY4743,<br><i>PKC1/pkc1::KAN</i> | Heterozygous<br>Deletion Library |
| <b>Sc <i>rim101</i></b>    | <i>S. cerevisiae</i><br>BY4741 <i>rim101Δ</i>       | As BY4741,<br><i>rim101::KAN</i>    | Homozygous<br>Deletion Library   |
| <b>Sc <i>rim13</i></b>     | <i>S. cerevisiae</i><br>BY4741 <i>rim13Δ</i>        | As BY4741,<br><i>rim13::KAN</i>     | Homozygous<br>Deletion Library   |
| <b>Sc <i>rim20</i></b>     | <i>S. cerevisiae</i><br>BY4741 <i>rim20Δ</i>        | As BY4741,<br><i>rim20::KAN</i>     | Homozygous<br>Deletion Library   |
| <b>Sc <i>rim21</i></b>     | <i>S. cerevisiae</i><br>BY4741 <i>rim21Δ</i>        | As BY4741,<br><i>rim21::KAN</i>     | Homozygous<br>Deletion Library   |
| <b>Sc <i>rim8</i></b>      | <i>S. cerevisiae</i><br>BY4741 <i>rim8Δ</i>         | As BY4741, <i>rim8::KAN</i>         | Homozygous<br>Deletion Library   |
| <b>Sc <i>rlm1</i></b>      | <i>S. cerevisiae</i><br>BY4741 <i>rlm1Δ</i>         | As BY4741, <i>rlm1::KAN</i>         | Homozygous<br>Deletion Library   |
| <b>Sc <i>slt2</i></b>      | <i>S. cerevisiae</i><br>BY4741 <i>slt2Δ</i>         | As BY4741, <i>slt2::KAN</i>         | Homozygous<br>Deletion Library   |
| <b>Sc <i>swi4</i></b>      | <i>S. cerevisiae</i><br>BY4741 <i>swi4Δ</i>         | As BY4741, <i>swi4::KAN</i>         | Homozygous<br>Deletion Library   |
| <b>Sc <i>swi6</i></b>      | <i>S. cerevisiae</i><br>BY4741 <i>swi6Δ</i>         | As BY4741, <i>swi6::KAN</i>         | Homozygous<br>Deletion Library   |

**Table S8. Oligonucleotides used in this study.** Related to Figure 4 and Figure 5.

## SUPPLEMENTAL EXPERIMENTAL PROCEDURES

### Strains and Culture Conditions

Archives of *C. albicans* and *S. cerevisiae* were maintained at -80C in 25% glycerol. Strains were grown in either synthetic complete medium (SC: 0.67% Difco™ yeast nitrogen base w/o amino acids, 0.08% amino acid add back and 2% glucose) or in yeast peptone dextrose (YPD, 1% yeast extract, 2% bactopectone, 2% glucose) as indicated. 2% agar was added for solid media. Strains used in this study are listed in Table S7.

### High-Throughput Screening Conditions

The McMaster Bioactives collection, a compilation of chemicals purchased from Prestwick, Biomol, Sigma, and Microsource, was screened at a final concentration of 12.5  $\mu\text{M}$  in the presence and absence of  $\frac{1}{4}$  MIC antifungal (Amphotericin B, Benomyl, Caspofungin, Cyprodinil, Fluconazole and Terbinafine). Screens were performed using *C. albicans* (ATCC 90028), *C. neoformans* (H99), *S. cerevisiae* (BY4741), and *S. pombe* (ATCC 38366). For each assay plate, the 32 high and 32 low growth controls were used to calculate residual growth within each well on the same assay plate as follows:

$$RG = ((A_{600} - (\mu - c)) \div ((\mu + c) - (\mu - c)))$$

where  $\mu+c$ , and  $\mu-c$  are the  $A_{600}$  averages of the high-growth (+c) and low-growth (-c) controls. The robustness of the screen was measured by calculating the  $Z'$  score and all screens achieved a  $Z'$  above 0.5 indicating an adequate screening window (Zhang, Chung et al. 1999). Screens were conducted in duplicate in 384-well flat bottom microtitre plates (ThermoScientific) with a final volume of 80  $\mu\text{L}$ . A Beckman Biomek FX liquid handler (Beckman Coulter Inc., Fullerton, CA) was used to dispense 1  $\mu\text{L}$  of McMaster Bioactive compound at a 1mM concentration and 1  $\mu\text{L}$  of antifungal at 80X concentration used for the screen. This was followed by the addition of 78  $\mu\text{L}$  of diluted cell culture prepared in SC. For preparation of diluted yeast culture, liquid overnight cultures in were diluted to an  $\text{OD}_{600}$  of 0.14, followed by a 1:1000 dilution in SC media. Positive growth controls (DMSO only) and negative growth controls (antifungal above the MIC) were included in rows 1, 2, 23 and 24 of each plate for normalization. Plates were incubated at 30°C. The  $\text{OD}_{600}$  was measured after 48 h of growth for *S. cerevisiae*



and *C. albicans* or 72 h of growth for *C. neoformans* and *S. pombe*. Growth controls on each plate were used to generate percentage growth data, and replicates were plotted against each other to identify outliers. All data was normalized for plate- and row/column-specific effects as described previously (Spitzer, Griffiths et al. 2011). To identify compounds that potentiated antifungals, growth in the presence of the antifungal was plotted against growth in the absence of the antifungal and data was fit to a linear model. Hits were considered those compounds that were 3 median absolute deviations (MADs) below the diagonal, inhibited growth on their own less than 50%, and resulted in at least 80% growth inhibition in the presence of the antifungal. Chemical-chemical interactions were generated using the program Cytoscape v3.2.1 (<http://www.cytoscape.org>).

### **Drug Susceptibility Assays**

MIC and checkerboard assays were performed in U-bottom, 96-well microtiter plates (Fisher Scientific) using a modified broth microdilution protocol as described (LaFayette et al., 2010). In brief, assays were set up in SC media in a total volume of 0.2 mL/well with 2-fold dilutions of drug. Plates were incubated in the dark for 48 h-72 h, and absorbance was determined at 600 nm using a spectrophotometer (Molecular Devices). Each strain was tested in duplicate on at least two occasions. Data was quantitatively displayed with color using the program Java TreeView 1.1.6 (<http://jtreeview.sourceforge.net>). For growth curve analysis, overnight cultures were diluted to OD<sub>600</sub> of 0.0625 with or without compound as indicated and grown at 30°C with continuous shaking, using the TECAN Sunrise. Optical density was measured at

595 nm every 15 min over 24 h – 48 h. Data was plotted and analyzed using GraphPad Prism.

### **Sequencing Analysis for Chemical Genomic Assays**

The Illumina MiSeq platform and MiSeq Reagent kit v3 (2 x 75 bp) were used for sequencing. To avoid problems with cluster identification due to low diversity during the first 18 cycles, which correspond to the common deletion strain primer sequences, we started the run with 'dark cycle sequencing' through these first 18 nucleotides (sequencing chemistry occurs, but no imaging). Next Gen sequencing data were trimmed and counted with R scripts. PatMaN software was used to match sequences to barcodes (Prüfer, Stenzel et al. 2008). All sequences with up to 3 mismatches to barcodes were kept. Log<sub>2</sub> ratios of compound-treated versus DMSO-treated samples were generated and data was normalized by calculating Z-scores.

### **Sequencing of Fluconazole-Resistant Isolate of *C. albicans***

The fluconazole-resistant isolate of *C. albicans* was grown in YPD medium to late log-phase at which time gDNA was extracted using phenol-chloroform extraction methods. *ERG11*, *TAC1* and *UPC2* were amplified using primer combination indicated in Table S8. PCR products were sent for sequencing at the Farncombe Metagenomics Facility at McMaster University. Sequencing results were aligned relative to reference sequences obtained from *C. albicans* SC5314 Assembly 22.

### **Murine Model of *C. albicans* Infection.**

For murine exposure, male CD1 mice (Charles River Laboratories) aged 5-6 weeks (20-25 g) were infected via the tail vein with 200  $\mu$ l of a  $1 \times 10^6$  CFU/ml PBS suspension of *C. albicans* SC5314. Each treatment group consisted of 5 mice. Fluconazole is purchased from the Duke Pharmacy Storeroom (Pfizer, 16 mg/kg) and caspofungin, also from Duke Pharmacy, (Merck, 0.1 mg/kg) were administered i.p. whereas clofazimine (Sigma, 5 mg/kg) was administered by oral gavage. Drugs were given injected at 4 h, 24 h, 48 h, and 72 h post infection. Mice were observed daily for signs of illness. All murine work was performed under a protocol, approved by the Institutional Animal Use and Care Committee at Duke University Medical Center.

### **Ethics Statement**

Animals studies were conducted in the Division of Laboratory Animal Resources (DLAR) facilities at Duke University Medical Center (DUMC) in good practice as defined by the United States Animal Welfare Act and in full compliance with the guidelines of the DUMC Institutional Animal Care and Use Committee (IACUC). The vertebrate animal experiments were reviewed and approved by the DUMC IACUC under protocol number A114-14-05.

### **SUPPLEMENTAL REFERENCES**

Giaever, G., A. M. Chu, L. Ni, C. Connelly, L. Riles, S. Veronneau, S. Dow, A. Lucau-Danila, K. Anderson, B. Andre, A. P. Arkin, A. Astromoff, M. El-Bakkoury, R. Bangham, R. Benito, S. Brachat, S. Campanaro, M. Curtiss, K. Davis, A. Deutschbauer, K. D. Entian, P. Flaherty, F. Foury, D. J. Garfinkel, M. Gerstein,

D. Gotte, U. Guldener, J. H. Hegemann, S. Hempel, Z. Herman, D. F. Jaramillo, D. E. Kelly, S. L. Kelly, P. Kotter, D. LaBonte, D. C. Lamb, N. Lan, H. Liang, H. Liao, L. Liu, C. Luo, M. Lussier, R. Mao, P. Menard, S. L. Ooi, J. L. Revuelta, C. J. Roberts, M. Rose, P. Ross-Macdonald, B. Scherens, G. Schimmack, B. Shafer, D. D. Shoemaker, S. Sookhai-Mahadeo, R. K. Storms, J. N. Strathern, G. Valle, M. Voet, G. Volckaert, C. Y. Wang, T. R. Ward, J. Wilhelmy, E. A. Winzeler, Y. Yang, G. Yen, E. Youngman, K. Yu, H. Bussey, J. D. Boeke, M. Snyder, P. Philippsen, R. W. Davis and M. Johnston (2002). "Functional profiling of the *Saccharomyces cerevisiae* genome." Nature **418**(6896): 387-391.

Huh, W. K., J. V. Falvo, L. C. Gerke, A. S. Carroll, R. W. Howson, J. S. Weissman and E. K. O'Shea (2003). "Global analysis of protein localization in budding yeast." Nature **425**(6959): 686-691.

LaFayette, S. L., C. Collins, A. K. Zaas, W. A. Schell, M. Betancourt-Quiroz, A. A. Gunatilaka, J. R. Perfect and L. E. Cowen (2010). "PKC signaling regulates drug resistance of the fungal pathogen *Candida albicans* via circuitry comprised of Mkc1, calcineurin, and Hsp90." PLoS Pathog **6**(8). e1001069

Nierman, W. C., A. Pain, M. J. Anderson, J. R. Wortman, H. S. Kim, J. Arroyo, M. Berriman, K. Abe, D. B. Archer, C. Bermejo, J. Bennett, P. Bowyer, D. Chen, M. Collins, R. Coulsen, R. Davies, P. S. Dyer, M. Farman, N. Fedorova, N. Fedorova, T. V. Feldblyum, R. Fischer, N. Fosker, A. Fraser, J. L. Garcia, M. J. Garcia, A. Goble, G. H. Goldman, K. Gomi, S. Griffith-Jones, R. Gwilliam, B. Haas, H. Haas, D. Harris, H. Horiuchi, J. Huang, S. Humphray, J. Jimenez, N. Keller, H. Khouri, K. Kitamoto, T. Kobayashi, S. Konzack, R. Kulkarni, T.

- Kumagai, A. Lafon, J. P. Latge, W. Li, A. Lord, C. Lu, W. H. Majoros, G. S. May, B. L. Miller, Y. Mohamoud, M. Molina, M. Monod, I. Mouyna, S. Mulligan, L. Murphy, S. O'Neil, I. Paulsen, M. A. Penalva, M. Perteua, C. Price, B. L. Pritchard, M. A. Quail, E. Rabinowitsch, N. Rawlins, M. A. Rajandream, U. Reichard, H. Renauld, G. D. Robson, S. Rodriguez de Cordoba, J. M. Rodriguez-Pena, C. M. Ronning, S. Rutter, S. L. Salzberg, M. Sanchez, J. C. Sanchez-Ferrero, D. Saunders, K. Seeger, R. Squares, S. Squares, M. Takeuchi, F. Tekaia, G. Turner, C. R. Vazquez de Aldana, J. Weidman, O. White, J. Woodward, J. H. Yu, C. Fraser, J. E. Galagan, K. Asai, M. Machida, N. Hall, B. Barrell and D. W. Denning (2005). "Genomic sequence of the pathogenic and allergenic filamentous fungus *Aspergillus fumigatus*." Nature **438**(7071): 1151-1156.
- Noble, S. M. and A. D. Johnson (2005). "Strains and strategies for large-scale gene deletion studies of the diploid human fungal pathogen *Candida albicans*." Eukaryot Cell **4**(2): 298-309.
- Prüfer, K., U. Stenzel, M. Dannemann, R. E. Green, M. Lachmann and J. Kelso (2008). "PatMaN: rapid alignment of short sequences to large databases." Bioinformatics **24**(13): 1530-1531.
- Spitzer, M., E. Griffiths, K. M. Blakely, J. Wildenhain, L. Ejim, L. Rossi, G. De Pascale, J. Curak, E. Brown, M. Tyers and G. D. Wright (2011). "Cross-species discovery of syncretic drug combinations that potentiate the antifungal fluconazole." Mol Syst Biol **7**: 499.

Zhang, J. H., T. D. Chung and K. R. Oldenburg (1999). "A Simple Statistical Parameter for Use in Evaluation and Validation of High Throughput Screening Assays." J Biomol Screen **4**(2): 67-73.
